# Supplementary material for: Unique binding modes for the broad neutralizing activity of single-chain variable fragments (scFv) targeting CD4-induced epitopes
Source: PubMed Central journal article supplement (PMC5610415; doi:10.1186/s12977-017-0369-y), 2017-09-22

### a: Heavy chain

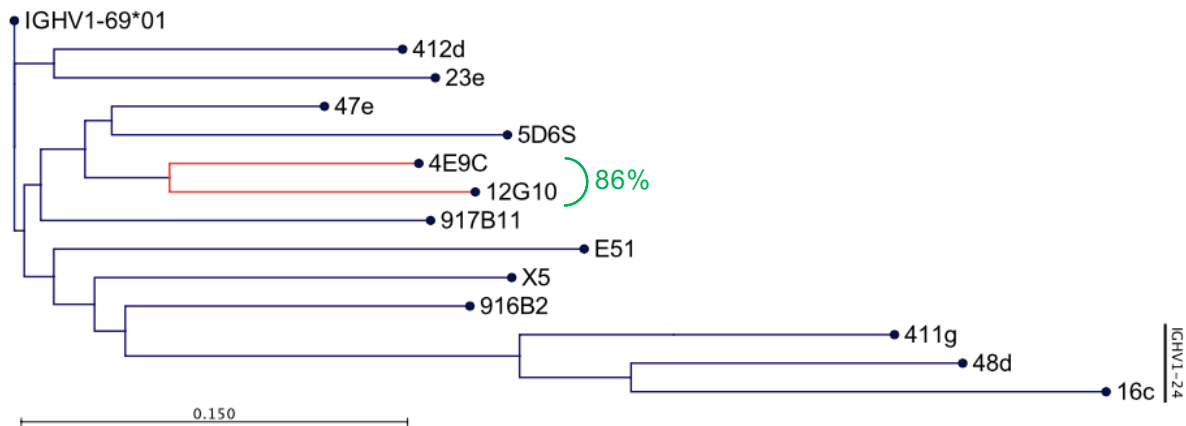

### b: Kappa chain

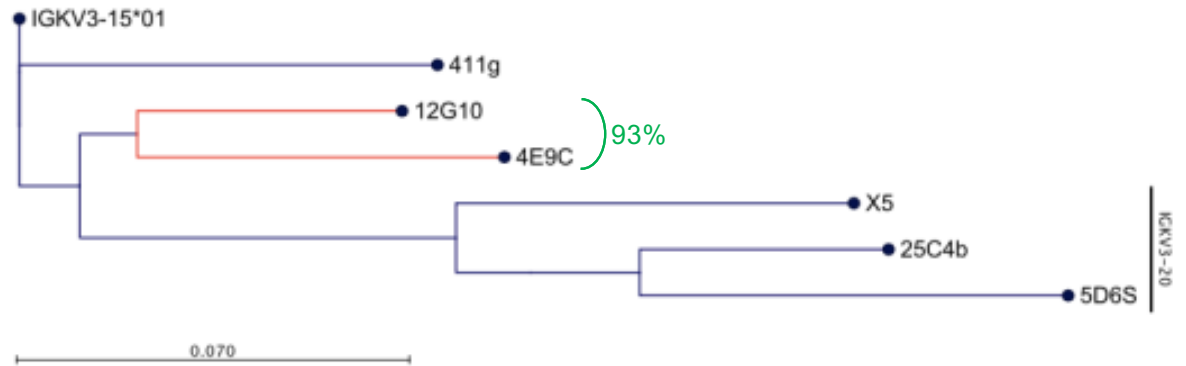

Supplement: 12977_2017_369_MOESM6_ESM.pdf [file 12977_2017_369_MOESM6_ESM.pdf]
